# Supplementary material for: A novel cyan-emitting phosphor KScSrSi2−yGeyO7:0.07Bi3+ for white LEDs with high color rendering index and low correlated color temperature
Source: Royal Society of Chemistry journal article supplement (doi:10.1039/d1ce01620b), 2022-01-01
Supplement: d1ce01620b1.pdf [file d1ce01620b1.pdf]

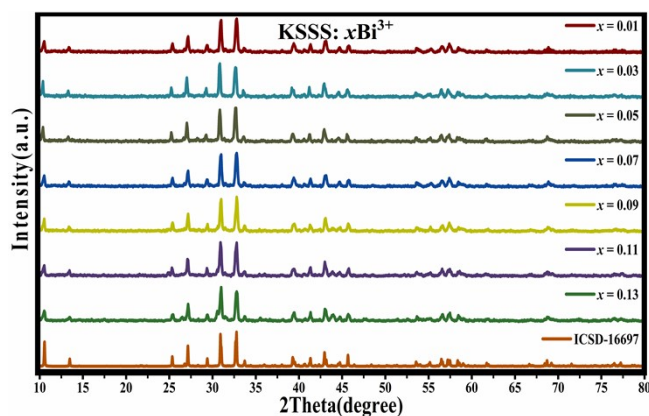

Figure S1. XRD patterns of KSSS: Bi<sup>3+</sup> (0 < x < 0.13) and the standard of KScSrSi<sub>2</sub>O<sub>7</sub> (ICSD-166997).

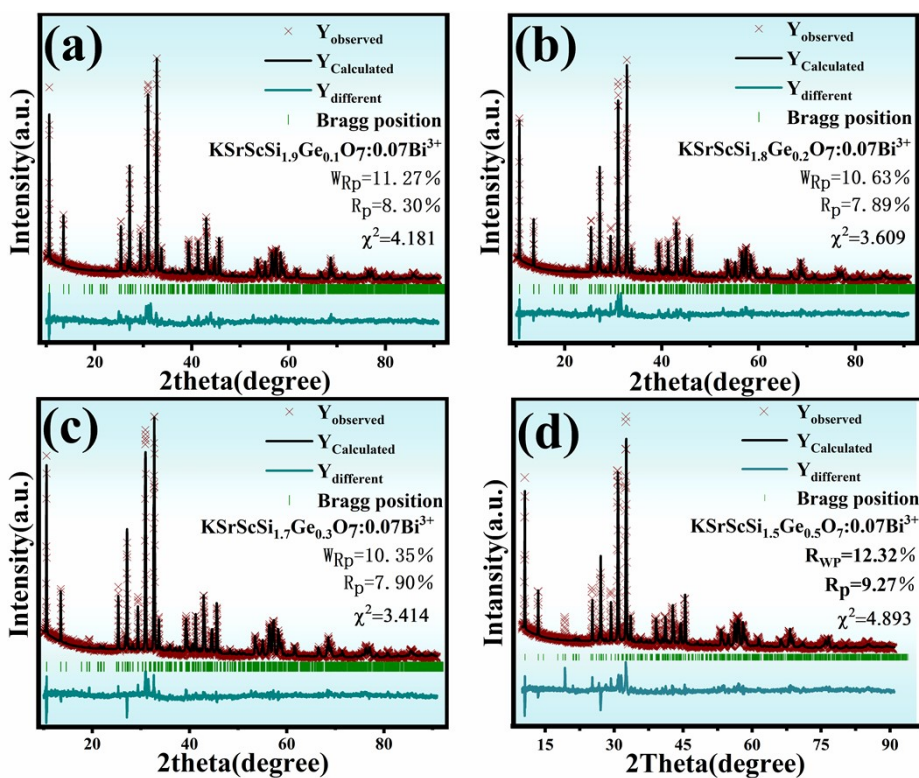

Figure S2. Rietveld refinement results of KSSS<sub>2-y</sub>G<sub>y</sub>: 0.07Bi<sup>3+</sup> with (a) y = 0.1, (b) y = 0.2, (c) y = 0.3, (d) y = 0.5.

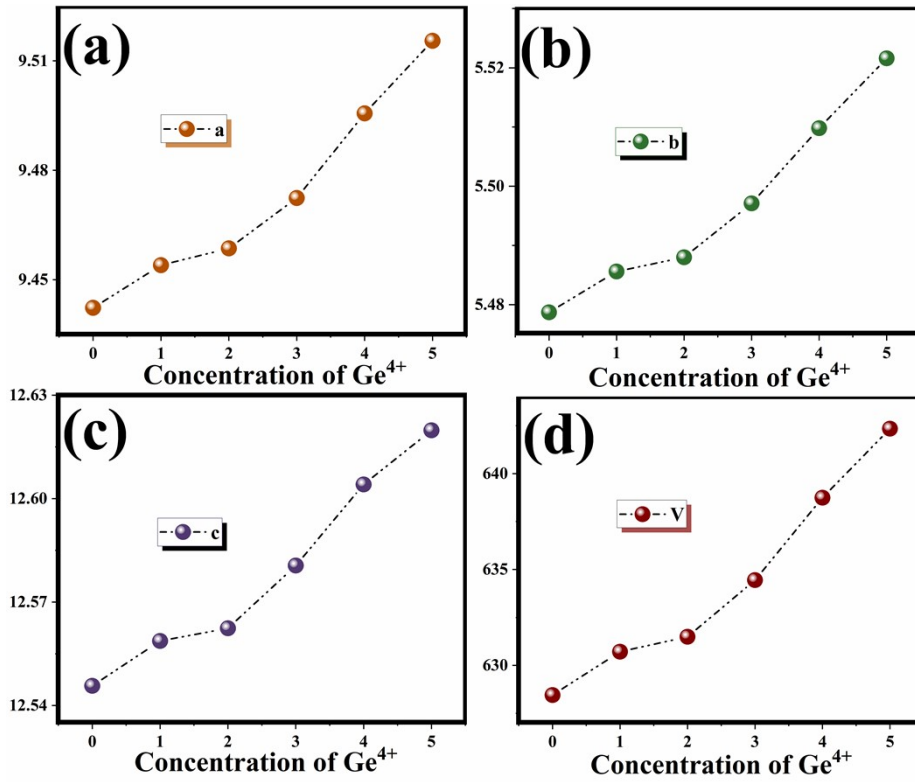

Figure S3. The changes in lattice parameters of  $\text{KSSS}_{2-y}\text{G}_y: 0.07\text{Bi}^{3+}$ .

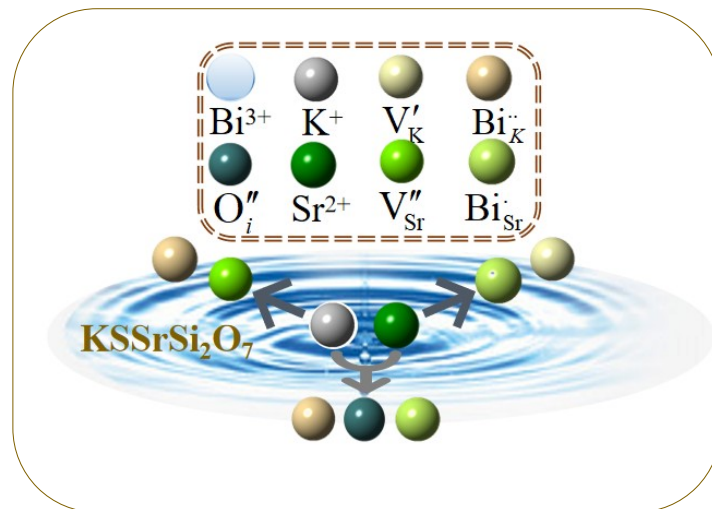

Figure S4. Schematic diagram of the internal defects of the sample after  $\text{Bi}^{3+}$  enters the  $\text{KSSS}$ .

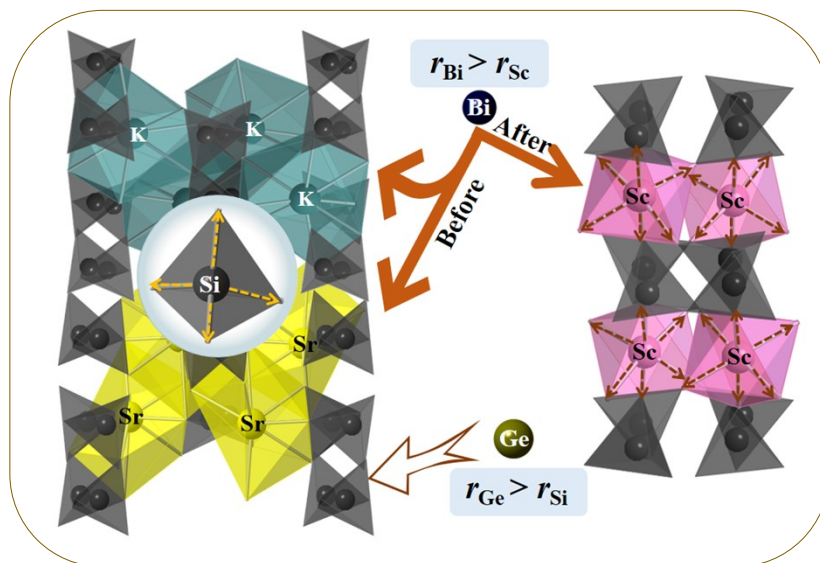

Figure S5. Schematic diagram of occupancy changes of  $\text{Bi}^{3+}$  in  $\text{KSS}_{2-y}\text{G}_y:0.07\text{Bi}^{3+}$ .
